# Supplementary material for: Unveiling Fungal Community Structure along Different Levels of Anthropic Disturbance in a South American Subtropical Lagoon
Source: MDPI journal article supplement (doi:10.3390/jof9090890), 2023-08-31
Supplement: s1 [file s1]

**Table S4: Physicochemical features of distinct sampling areas in Tramandaí Lagoon (Brazil).**

| <b>Sampling Points/<br/>Features</b> | <b>Estuary<br/>(P1)</b> | <b>Middle Lagoon<br/>(P2)</b> | <b>Cops fields<br/>(P3)</b> | <b>Residential<br/>(P4)</b> |
|--------------------------------------|-------------------------|-------------------------------|-----------------------------|-----------------------------|
| BOD (mg/L)                           | 1.34                    | 1.92                          | 1.73                        | 0.96                        |
| OD (mg/L)                            | 7.49                    | 7.87                          | 7.10                        | 6.53                        |
| pH                                   | 7.82                    | 7.77                          | 7.68                        | 7.53                        |
| Chlorides (mg/L)                     | 6626.70                 | 4597.83                       | 4487.04                     | 754.77                      |
| Salinity (‰)                         | 11.97                   | 8.31                          | 8.11                        | 1.36                        |
| Conductivity<br>(µs/cm)              | 1874.00                 | 13000.00                      | 12730.00                    | 1690.00                     |
| Water<br>Temperature (°C)            | 24                      | 23                            | 23                          | 25                          |
