# Supplementary figures and images for: Unveiling Fungal Community Structure along Different Levels of Anthropic Disturbance in a South American Subtropical Lagoon
Source: MDPI journal article supplement (doi:10.3390/jof9090890), 2023-08-31

Axis 2

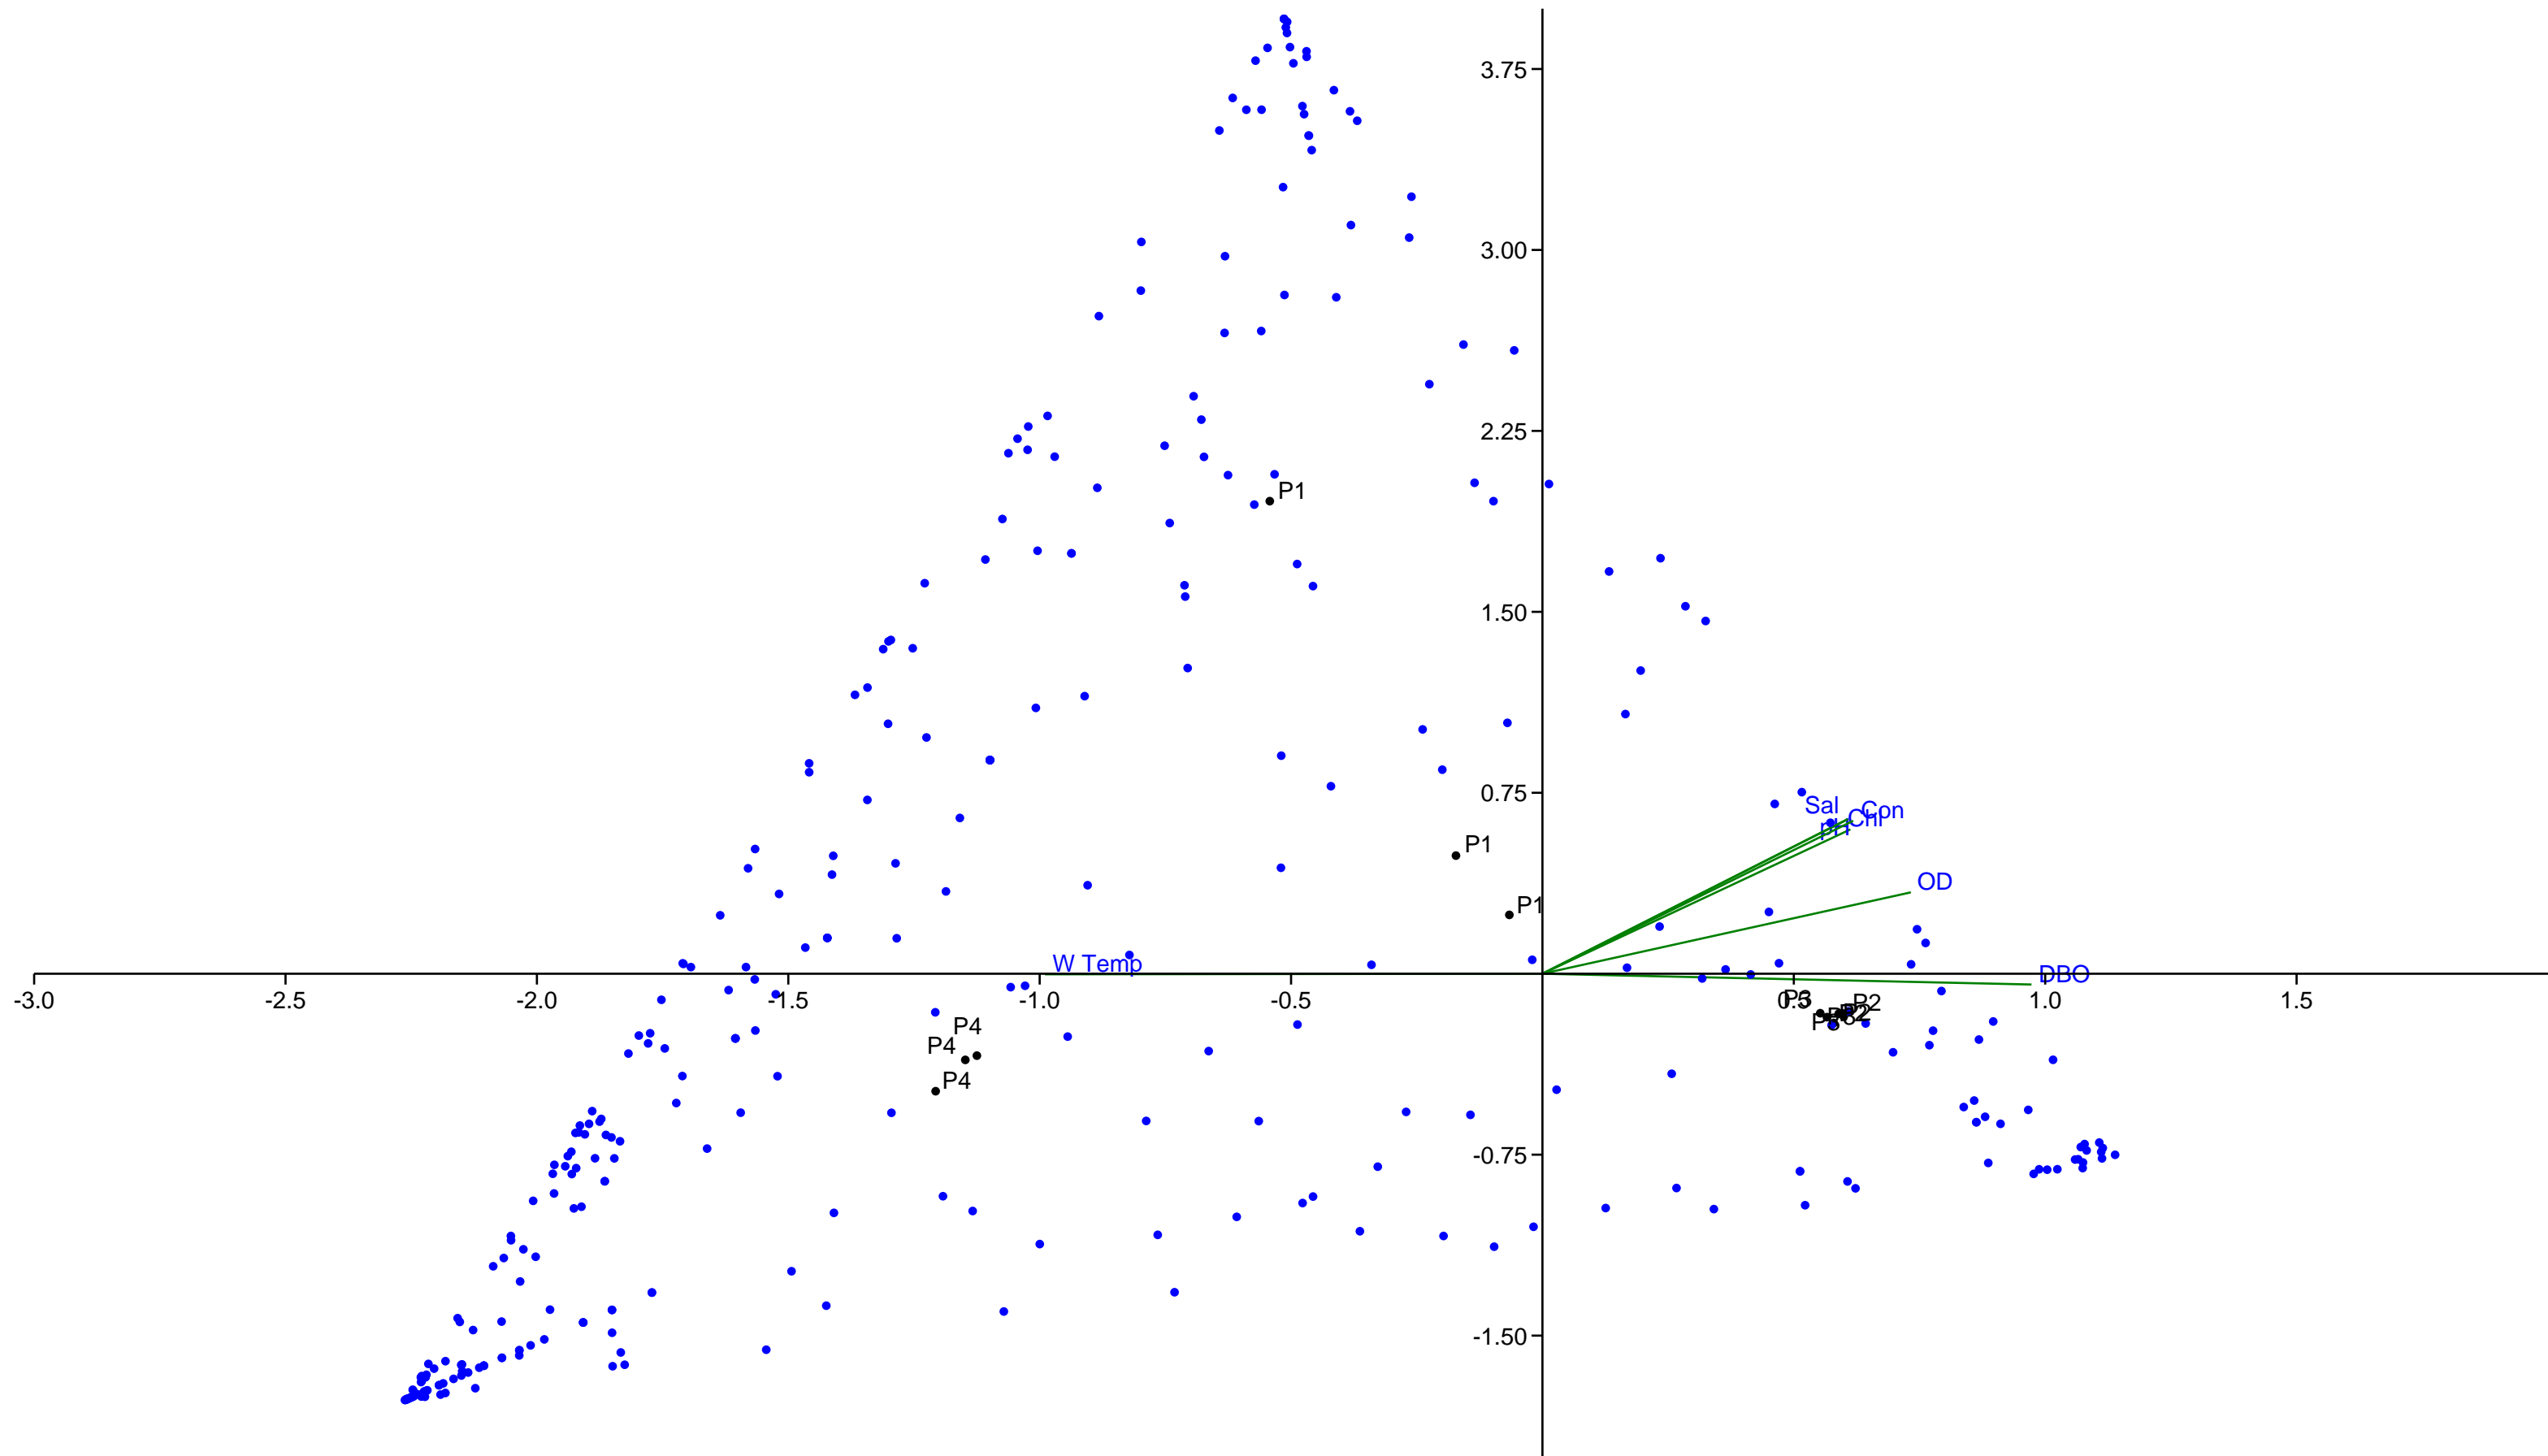

Axis 1

Supplement: s1 [file s1]

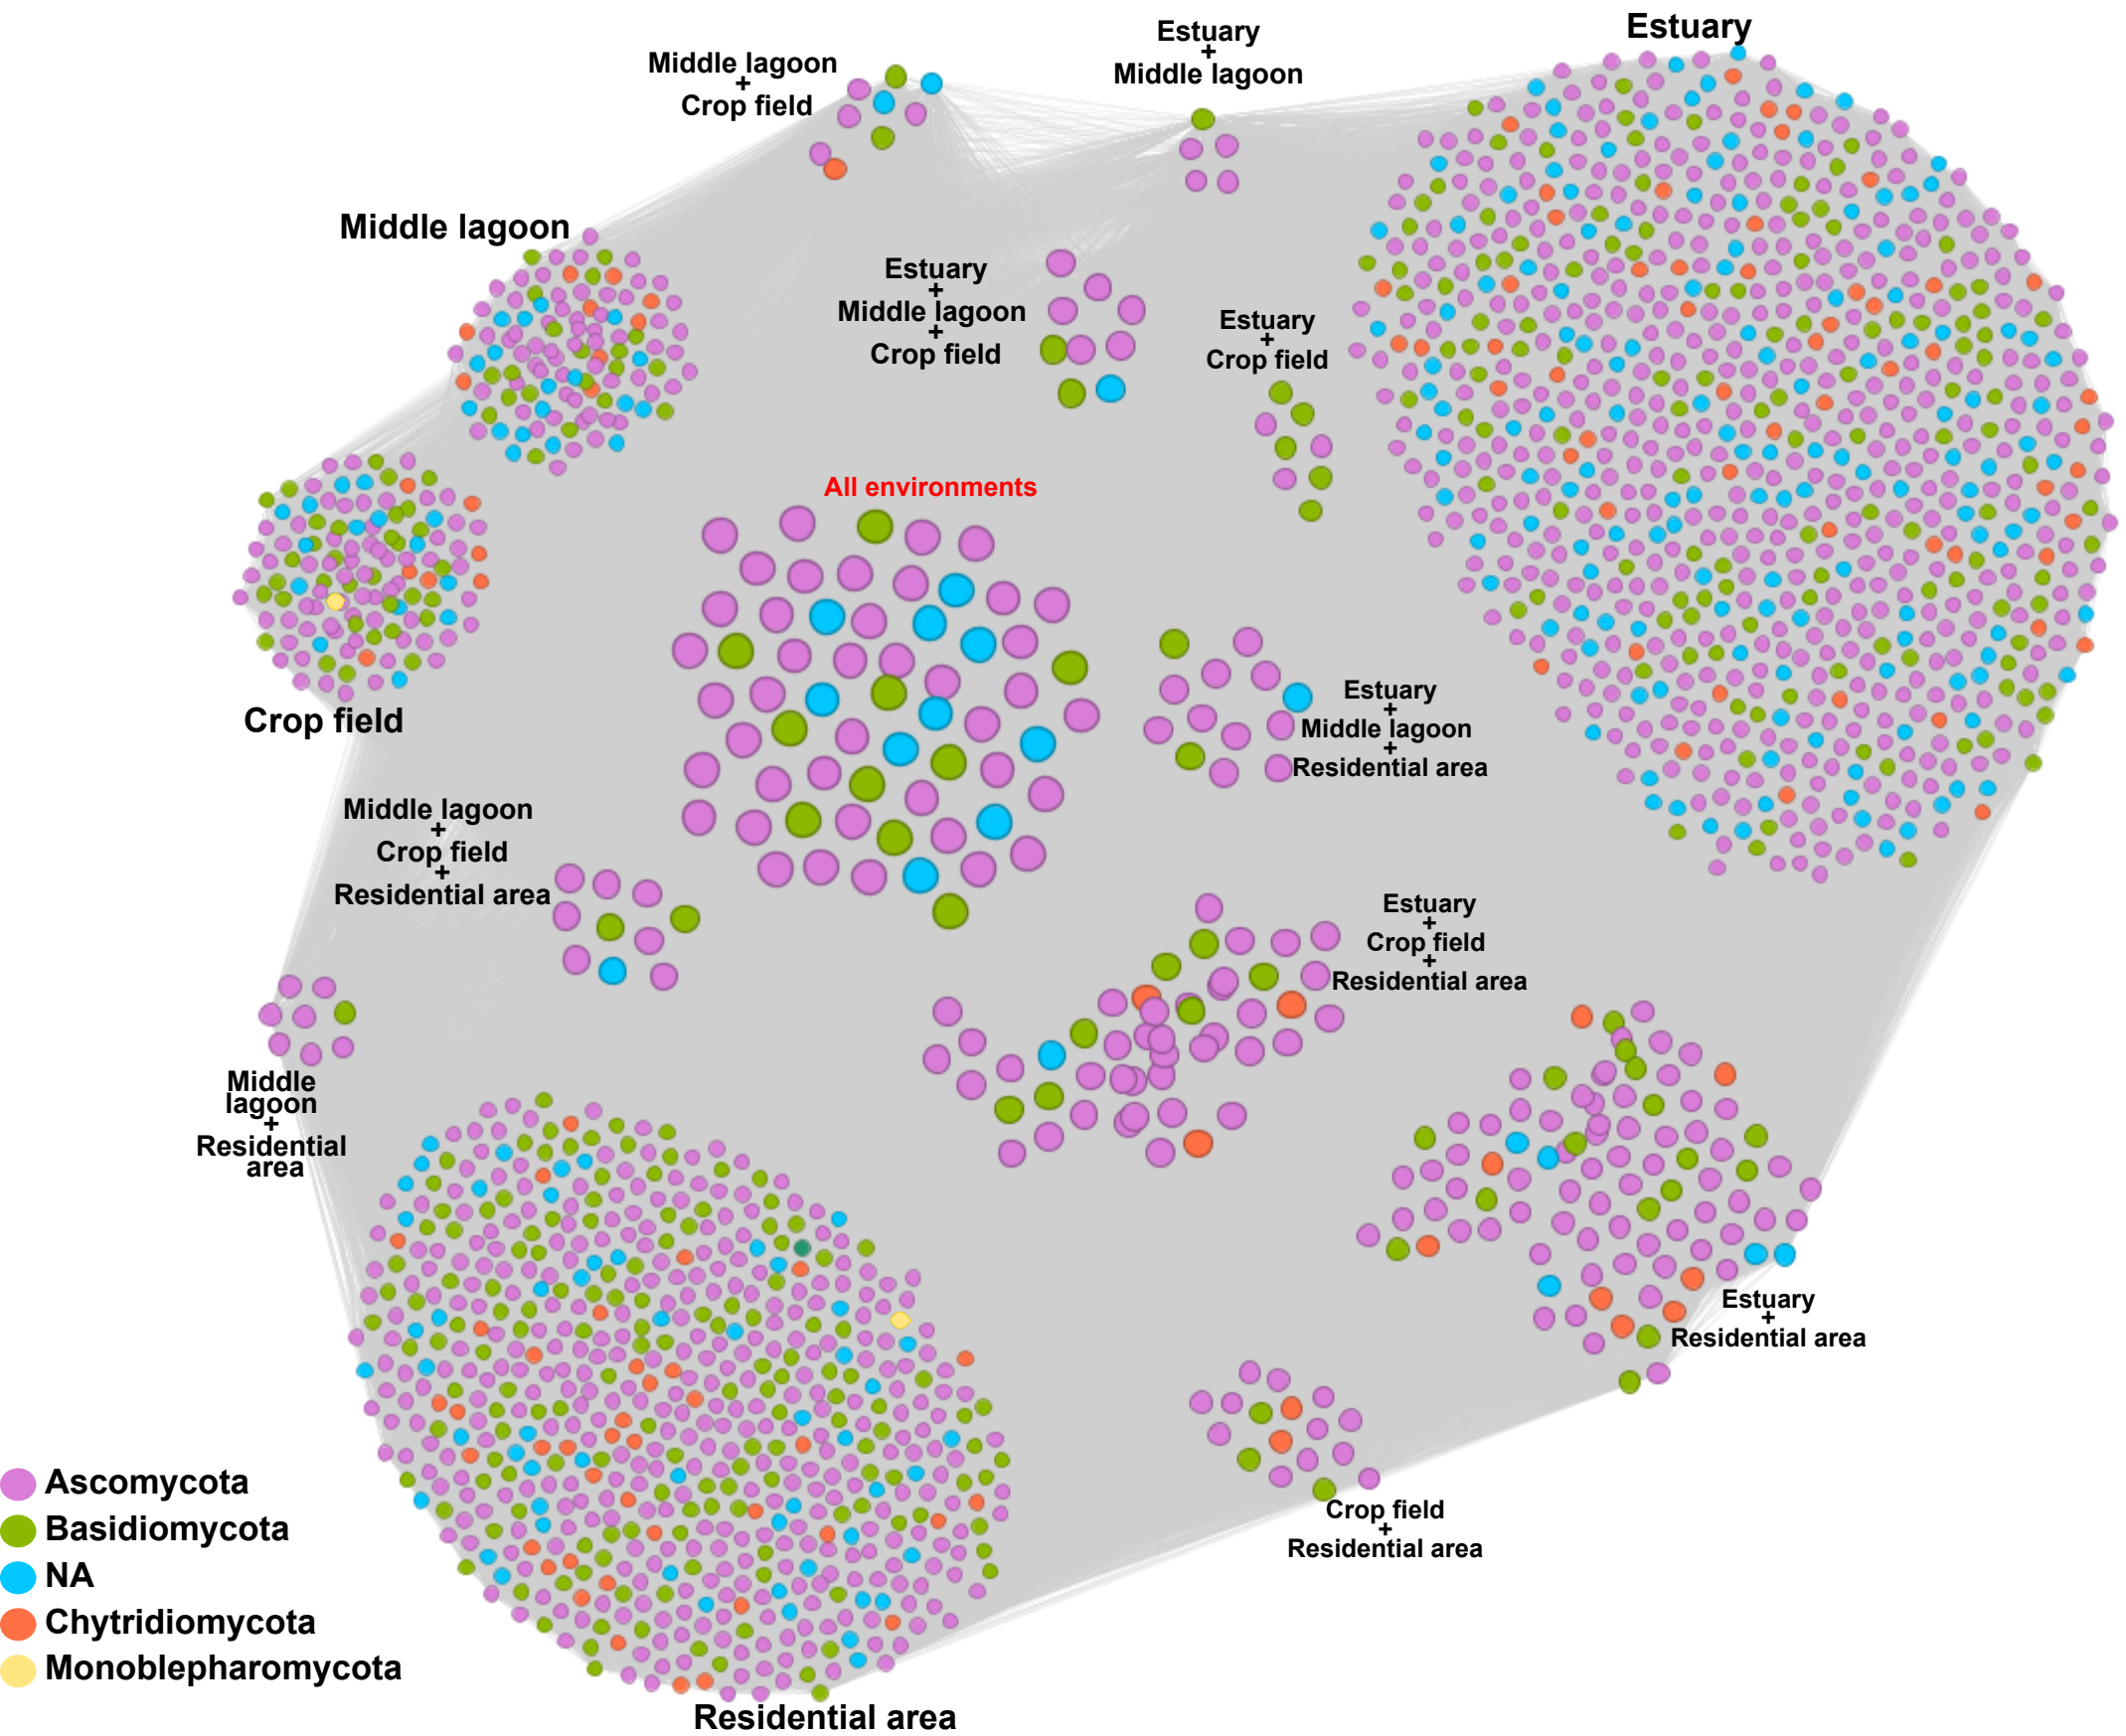

Supplement: s1 [file s1]
